# Supplementary material for: Lamellar flower-like porous MoS2 as an efficient cocatalyst to boost photocatalytic hydrogen evolution of CdS
Source: Royal Society of Chemistry journal article supplement (doi:10.1039/d0cy02100h), 2020-11-27
Supplement: d0cy02100h1.pdf [file d0cy02100h1.pdf]

## Supporting Information

### Lamellar Flower-Like Porous MoS<sub>2</sub> as an Efficient Cocatalyst to Boost Photocatalytic Hydrogen Evolution of CdS

Lei Su, Lulu Luo, Junwen Wang, Tao Song, Weixia Tu\*, and Zhou-jun Wang\*

*State Key Laboratory of Organic-Inorganic Composites, Beijing University of Chemical Technology, Beijing 100029, China*

\* Corresponding authors. E-mail: tuwx@mail.buct.edu.cn; wangzj@mail.buct.edu.cn.

#### Table of Contents

|                       |    |
|-----------------------|----|
| Characterization..... | 2  |
| Table S1.....         | 3  |
| Fig. S1.....          | 4  |
| Fig. S2.....          | 5  |
| Fig. S3.....          | 6  |
| Fig. S4.....          | 7  |
| Fig. S5.....          | 8  |
| Fig. S6.....          | 9  |
| Fig. S7.....          | 10 |
| Fig. S8.....          | 11 |
| References.....       | 12 |

## Characterization

The crystal structure was obtained by X-ray diffraction (XRD) using a Bruker D8 Advance diffractometer (Bruker AXS Ltd.) with Cu-K $\alpha$  radiation. Nitrogen (N<sub>2</sub>) adsorption-desorption isotherms were taken on a Quantachrome Autosorb iQ surface area analyzer at -196 °C. Scanning electron microscope (SEM) pictures were obtained from a S-4700F facility (JEOL Ltd.). Transmission electron microscope (TEM) photos were taken from a J-3010 instrument (JEOL Ltd.). A spectrophotometer (Tu-1901 Beijing General Instrument Co., Ltd.) was utilized to obtain the Ultraviolet-visible (UV-vis) diffuse reflectance spectra (DRS) using BaSO<sub>4</sub> as the reflectance background. X-ray photoelectron spectroscopy (XPS) spectra were obtained on a VG ESCALAB 250 spectrometer (Thermo Fisher Ltd.). The charging effect of powder samples in XPS was calibrated by C 1s (284.8 eV) of the adventitious carbon contamination. The element analysis was characterized on an inductively coupled plasma spectrometry-atomic emission spectrometer (ICP-AES, ULTIMA, JY Inc.). Photoluminescence spectra (PL) profiles were obtained on a F-7000 spectrophotometer (Hitachi Co., Ltd.). Photo-electrochemical characterizations were carried out using a CHI760E instrument in a standard three-electrode system. The counter electrode was Pt slice and the reference electrode was Hg/HgCl<sub>2</sub>. The electrolyte was Na<sub>2</sub>SO<sub>4</sub> aqueous solution (0.5 M). 2 mg sample was added into a mixture of Nafion (50  $\mu$ l) and ethanol (1 ml). The obtained solution was then sonicated for 30 min. After that, fluorine-doped tin oxide (FTO) glass (1.5  $\times$  1.5 cm<sup>2</sup>) was covered with the above solution (40  $\mu$ l) as the working electrodes. A 300 W Xe lamp was used as the light source ( $\lambda \geq 420$  nm).

**Table S1.** Comparison of photocatalytic activities for H<sub>2</sub> evolution on various MoS<sub>2</sub>/CdS composites.

| Photocatalyst         | Catalyst amount (mg) | Scavenger                                         | Light source                     | Amount of H <sub>2</sub> evolution (mmol h <sup>-1</sup> g <sup>-1</sup> ) | Ref.      |
|-----------------------|----------------------|---------------------------------------------------|----------------------------------|----------------------------------------------------------------------------|-----------|
| MoS <sub>2</sub> /CdS | 3                    | Lactic Acid                                       | 300 W<br>Xe lamp<br>(λ ≥ 420 nm) | 54.1                                                                       | This work |
| MoS <sub>2</sub> /CdS | 20                   | Lactic Acid                                       | 300 W<br>Xe lamp<br>(λ ≥ 420 nm) | 39.7                                                                       | S1        |
| MoS <sub>2</sub> /CdS | 20                   | Lactic Acid                                       | 300 W<br>Xe lamp<br>(λ ≥ 420 nm) | 38.75                                                                      | S2        |
| MoS <sub>2</sub> /CdS | 20                   | Lactic Acid                                       | 300 W<br>Xe lamp<br>(λ ≥ 400 nm) | 26.65                                                                      | S3        |
| MoS <sub>2</sub> /CdS | 20                   | Lactic Acid                                       | 300 W<br>Xe lamp<br>(λ ≥ 350 nm) | 26.14                                                                      | S4        |
| MoS <sub>2</sub> /CdS | 50                   | Na <sub>2</sub> S-Na <sub>2</sub> SO <sub>3</sub> | 300 W<br>Xe lamp<br>(λ ≥ 420 nm) | 17.2                                                                       | S5        |
| MoS <sub>2</sub> /CdS | 100                  | Lactic Acid                                       | 300 W<br>Xe lamp<br>(λ ≥ 420 nm) | 13.15                                                                      | S6        |
| MoS <sub>2</sub> /CdS | 50                   | Lactic Acid                                       | 300 W<br>Xe lamp<br>(λ ≥ 420 nm) | 12.38                                                                      | S7        |
| MoS <sub>2</sub> /CdS | 10                   | Lactic Acid                                       | 300 W<br>Xe lamp<br>(λ ≥ 420 nm) | 11.85                                                                      | S8        |
| MoS <sub>2</sub> /CdS | 100                  | Lactic Acid                                       | 300 W<br>Xe lamp<br>(λ ≥ 420 nm) | 10.85                                                                      | S9        |
| MoS <sub>2</sub> /CdS | 50                   | Lactic Acid                                       | 300 W<br>Xe lamp<br>(λ ≥ 420 nm) | 6.1                                                                        | S10       |

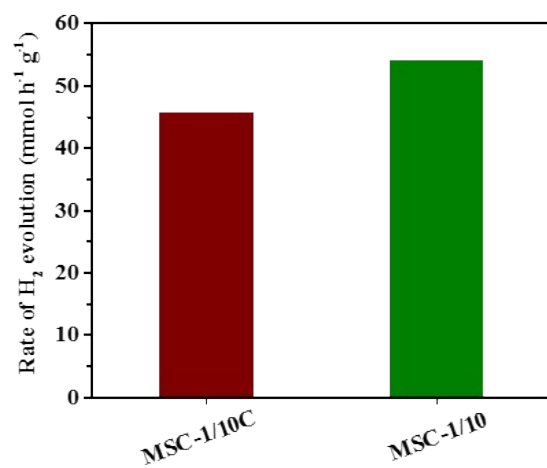

Fig. S1 H<sub>2</sub> evolution rates of the MSC-1/10C and MSC-1/10 photocatalysts.

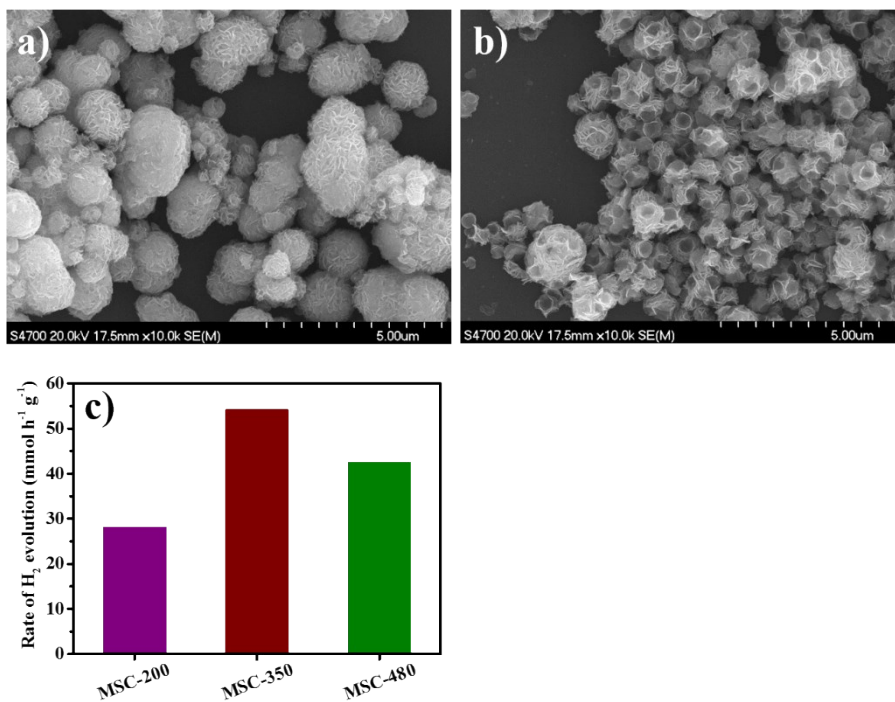

Fig. S2 SEM images of porous MoS<sub>2</sub>-200 (a) and porous MoS<sub>2</sub>-480 (b) as well as photocatalytic H<sub>2</sub> evolution activities of various porous MoS<sub>2</sub>/CdS composites (c).

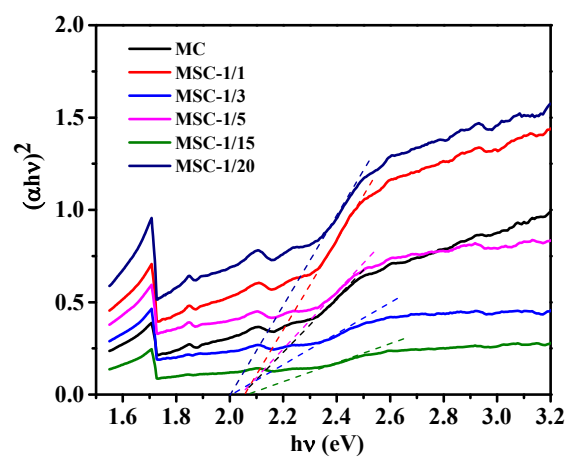

Fig. S3 The Tauc plots to determine band gaps of various porous MoS<sub>2</sub>/CdS composites.

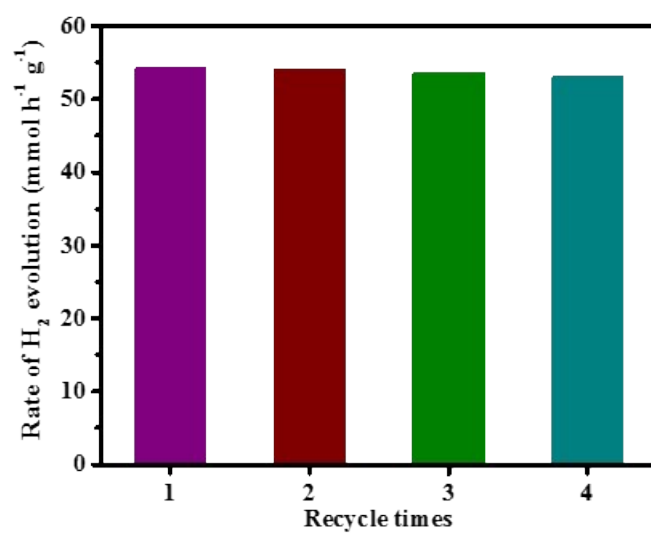

Fig. S4 Recycling runs of the porous MoS<sub>2</sub>/CdS composite (30% MSC) for H<sub>2</sub> evolution.

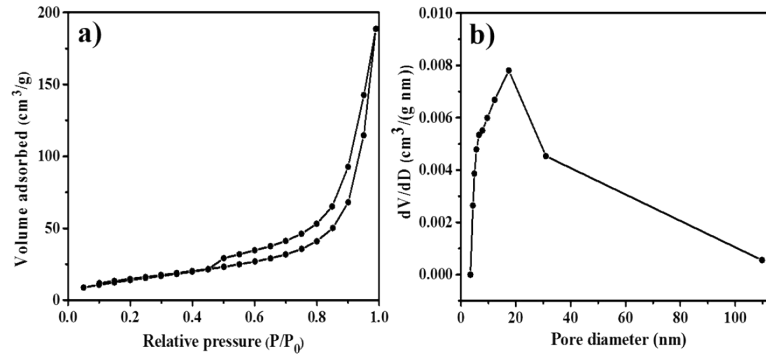

Fig. S5 N<sub>2</sub> adsorption-desorption isotherms and pore diameter distribution curves of the porous MoS<sub>2</sub>/CdS composite.



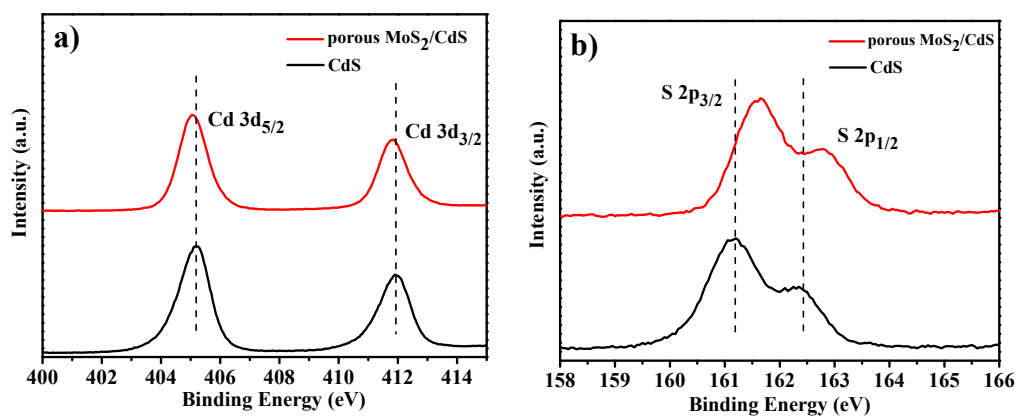

Fig. S6 Cd 3d (a) and S 2p XPS spectra of the porous MoS<sub>2</sub>/CdS composite in comparison with CdS.

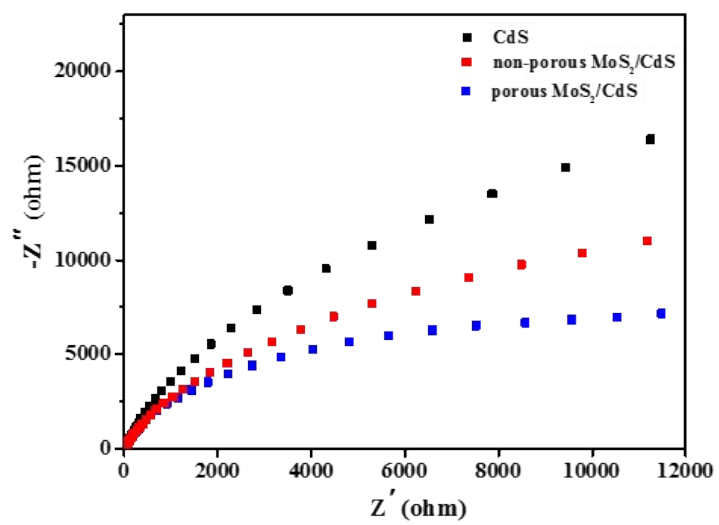

Fig. S7 Electrochemical impedance spectra of the sample electrodes containing CdS, non-porous  $\text{MoS}_2/\text{CdS}$  and porous  $\text{MoS}_2/\text{CdS}$ .

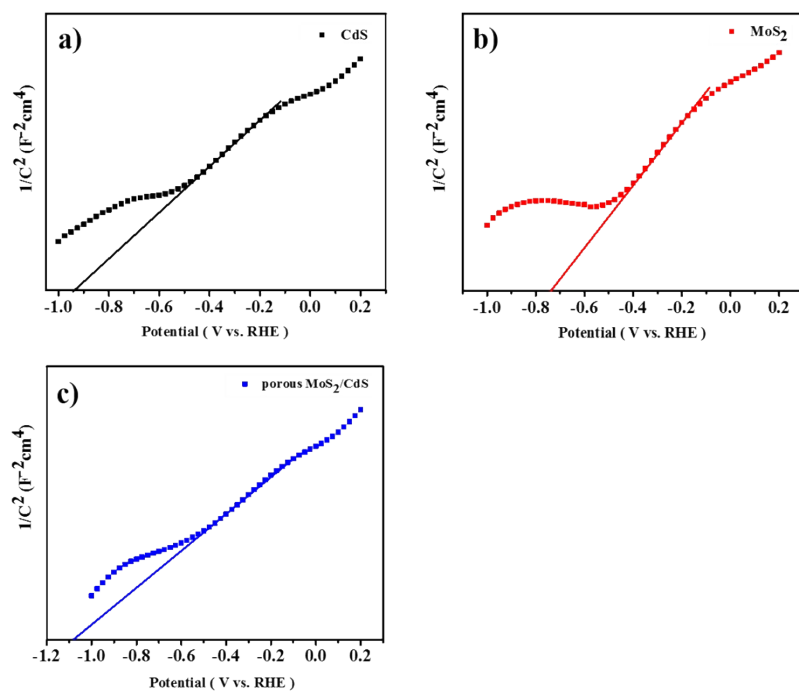

Fig. S8 Mott-Schottky results of CdS (a), MoS<sub>2</sub> (b) and porous MoS<sub>2</sub>/CdS composite

(c).

## References

- (S1) P. Du, Y. Zhu, J. Zhang, D. Xu, W. Peng, G. Zhang, F. Zhang and X. Fan, *RSC Adv.*, 2016, **6**, 74394-74399.
- (S2) A. Wu, C. Tian, Y. Jiao, Q. Yan, G. Yang and H. Fu, *Appl. Catal. B*, 2017, **203**, 955-963.
- (S3) B. Han, S. Liu, N. Zhang, Y.-J. Xu and Z.-R. Tang, *Appl. Catal. B*, 2017, **202**, 298-304.
- (S4) Y. Yang, Y. Zhang, Z. Fang, L. Zhang, Z. Zheng, Z. Wang, W. Feng, S. Weng, S. Zhang and P. Liu, *ACS Appl. Mater. Inter.*, 2017, **9**, 6950-6958.
- (S5) S. Zhang, H. Yang, H. Gao, R. Cao, J. Huang and X. Xu, *ACS Appl. Mater. Inter.*, 2017, **9**, 23635-23646.
- (S6) G. Chen, D. Li, F. Li, Y. Fan, H. Zhao, Y. Luo, R. Yu and Q. Meng, *Appl. Catal. A*, 2012, **443-444**, 138-144.
- (S7) C. Feng, Z. Chen, J. Hou, J. Li, X. Li, L. Xu, M. Sun and R. Zeng, *Chem. Eng. J.*, 2018, **345**, 404-413.
- (S8) R. K. Chava, J. Y. Do and M. Kang, *Appl. Surf. Sci.*, 2018, **433**, 240-248.
- (S9) H. Lin, Y. Li, H. Li and X. Wang, *Nano Res.*, 2017, **10**, 1377-1392.
- (S10) Y. Peng, J. Li, X. Qian, J. Zhang and J. Lin, *J. Nanopart. Res.*, 2018, **20**, 104.
